# Supplementary material for: Improvement of optical properties of AISI 304 as a solar absorber using a pulsed fiber laser
Source: Royal Society of Chemistry journal article supplement (doi:10.1039/d3ra03873d), 2023-01-01
Supplement: d3ra03873d1.pdf [file d3ra03873d1.pdf]

## Electronic Supplementary Information

### Improvement of optical properties of AISI 304 as a solar absorber using pulsed fiber laser

Narin Chomcharoen,<sup>a</sup> Tanyakorn Muangnapoh<sup>b</sup>, Bhawat Traipattanakul<sup>c</sup> and Krissada Surawathanawises<sup>\*a</sup>

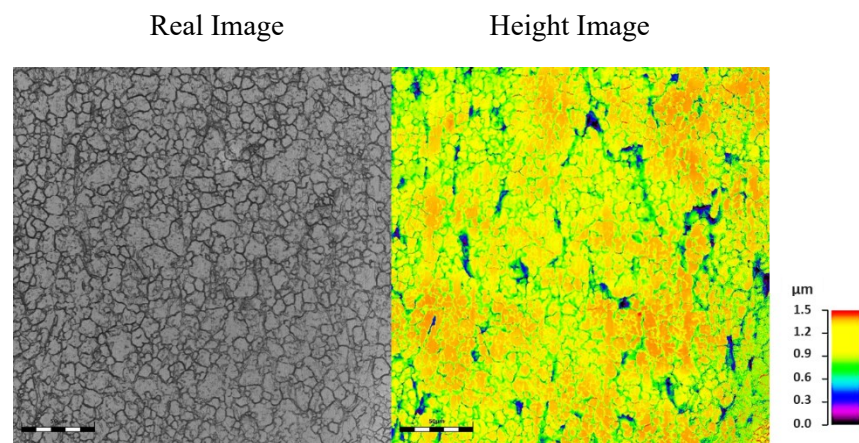

Specimen A

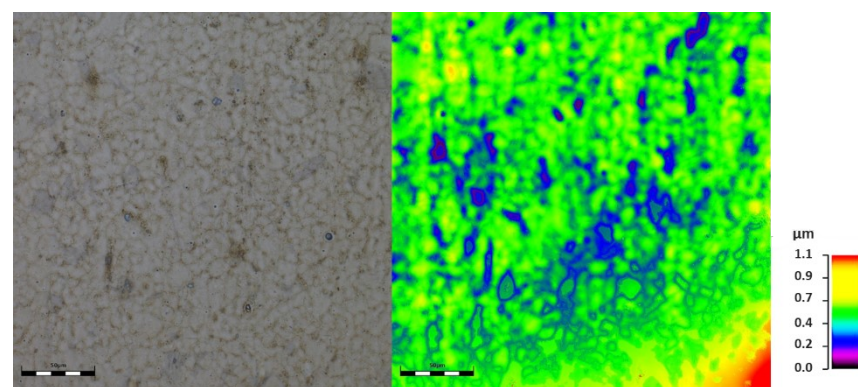

Specimen B

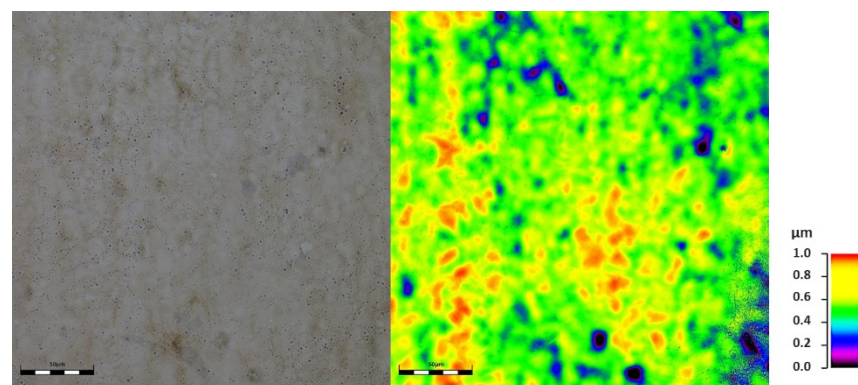

Specimen C

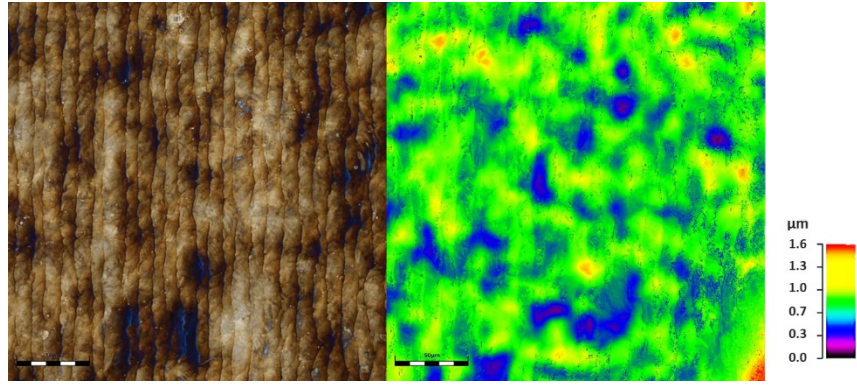

Specimen D

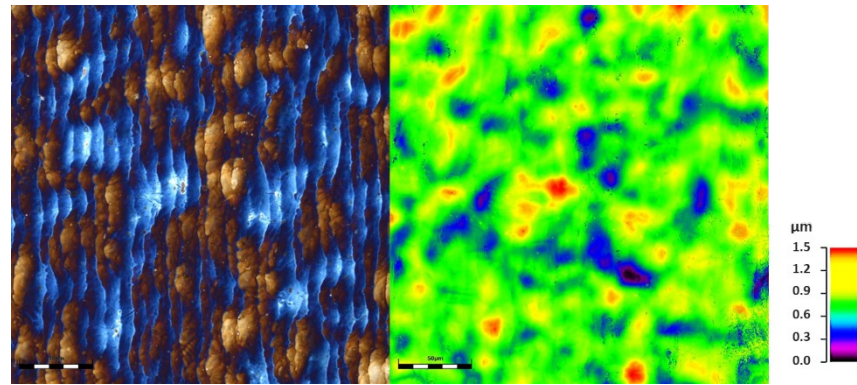

Specimen E

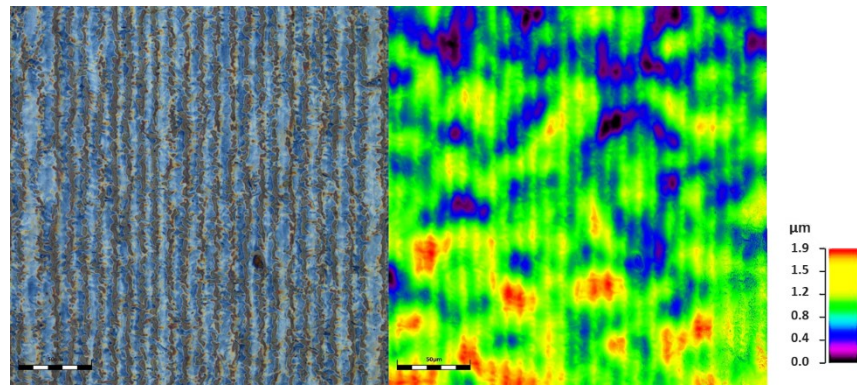

Specimen F

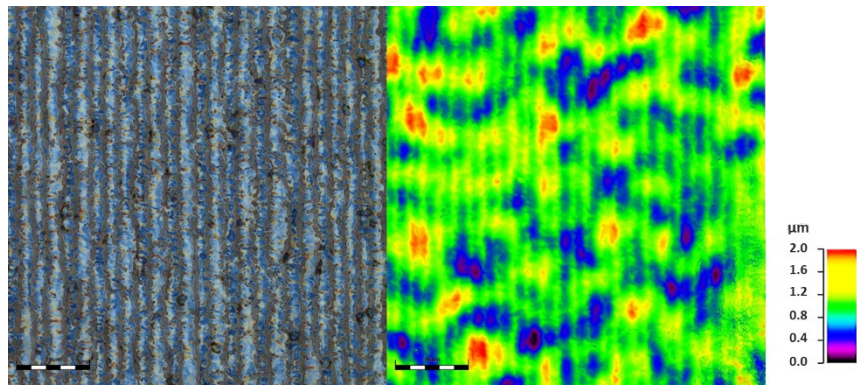

Specimen G

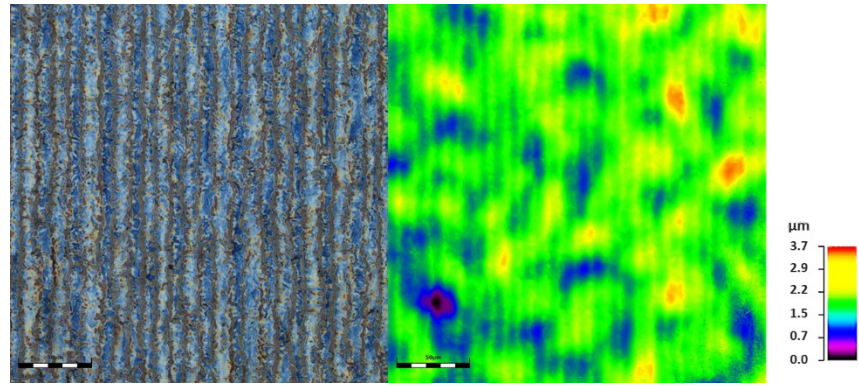

Specimen H

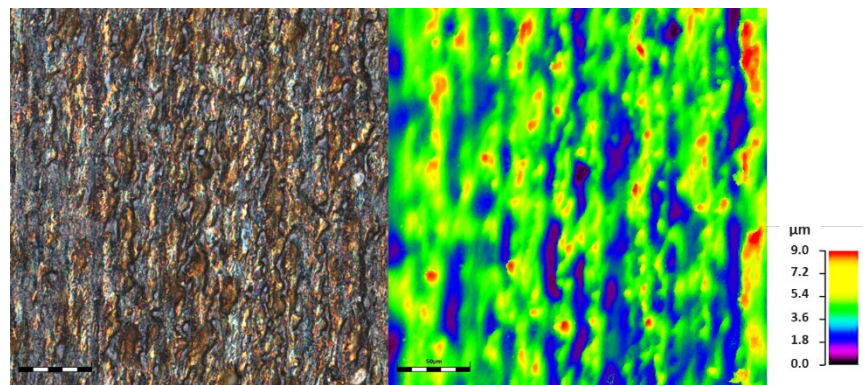

Specimen I

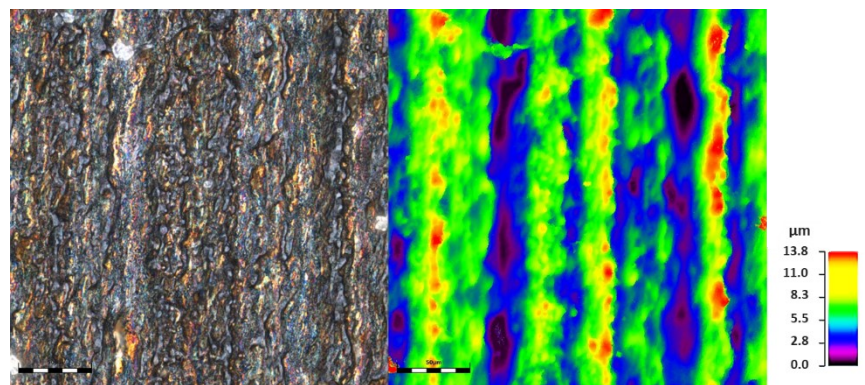

Specimen J

**Fig. S1** Height images of all modified specimens measured by confocal microscopy.

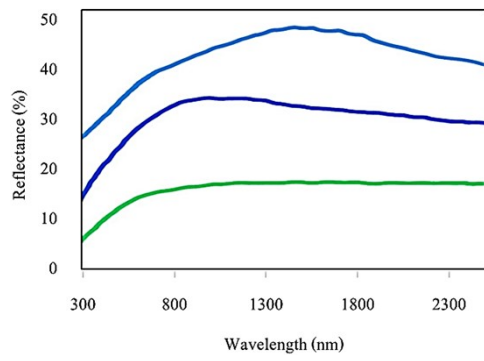

First region

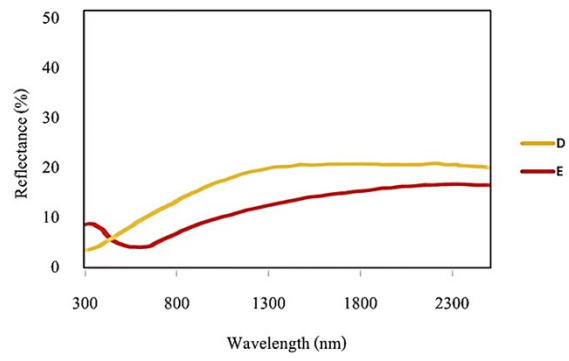

Second region

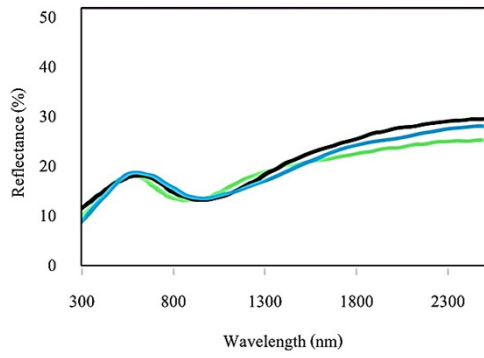

Third region

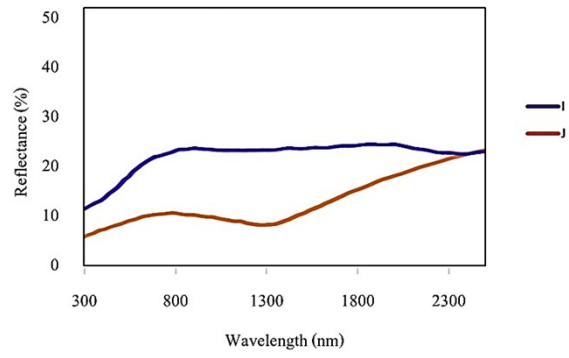

Fourth region

**Fig. S2** Spectral reflectance of all modified specimens measured by UV-Vis NIR Spectrophotometer.
